# Supplementary material for: Integration of cryobiopsies for interstitial lung disease diagnosis is a valid and safe diagnostic strategy—experiences based on 250 biopsy procedures
Source: PubMed Central journal article supplement — J Thorac Dis. 2021 Mar;13(3):1455–65. doi: 10.21037/jtd-20-2431 (PMC8024861; doi:10.21037/jtd-20-2431), 2021-03
Supplement: jtd-13-03-1455-dss.pdf [file jtd-13-03-1455-dss.pdf]

## Data Sharing Statement

|                     |                                                                                                                                                    |                                                                                                                                                                                                  |
|---------------------|----------------------------------------------------------------------------------------------------------------------------------------------------|--------------------------------------------------------------------------------------------------------------------------------------------------------------------------------------------------|
| <b>Article Info</b> | <a href="http://dx.doi.org/10.21037/jtd-20-2431">http://dx.doi.org/10.21037/jtd-20-2431</a> .                                                      |                                                                                                                                                                                                  |
| <b>Item</b>         | <b>Question</b>                                                                                                                                    | <b>Authors' Response<br/>(place "-" if not applicable)</b>                                                                                                                                       |
| 1                   | Would you like to share data collected for your study to others?                                                                                   | Data will be shared on reasonable request.                                                                                                                                                       |
| 2                   | If not, would you like to share the reason for your decision?                                                                                      |                                                                                                                                                                                                  |
| 3                   | What data in particular will be shared?                                                                                                            | Data registered for the project (baseline demographics, size and number of biopsies, histological patterns, their contribution to a confident diagnosis and complications, statistical analysis) |
| 4                   | Any other documents will be share? Such as study protocol, statistical analysis plan, informed consent form, clinical study report, analytic code. |                                                                                                                                                                                                  |
| 5                   | When will data availability begin?                                                                                                                 | Only upon request.                                                                                                                                                                               |
| 6                   | When will data availability end?                                                                                                                   |                                                                                                                                                                                                  |
| 7                   | To whom will you share the data?                                                                                                                   | For other researchers upon reasonable request.                                                                                                                                                   |
| 8                   | For what type of analysis or purpose?                                                                                                              |                                                                                                                                                                                                  |
| 9                   | How or where can the data/documents be obtained?                                                                                                   | By contacting the corresponding author.                                                                                                                                                          |
| 10                  | Any other restrictions?                                                                                                                            |                                                                                                                                                                                                  |
